# Supplementary material for: International Guidelines for the Treatment of Huntington's Disease
Source: Front Neurol. 2019 Jul 3;10:710. doi: 10.3389/fneur.2019.00710 (PMC6618900; doi:10.3389/fneur.2019.00710)
Supplement: Supplementary file 1 [file Table_1.XLSX]

## Sheet: Studies
Appendix 1
Symptom(s) for which the article was retained to formulate a recommendation	Type of intervention	Reference	Level of evidence
Agitation	Pharmacological	Korenyi C, Whittier JR. Drug treatment in 117 cases of Huntington’s disease with special reference to fluphenazine (Prolixin). Psychiatr Q. 1967;41(2):203‑10.	4
Agitation	Pharmacological	Rej S, Desautels R. Experience with intramuscular zuclopenthixol and medroxyprogesterone acetate in the treatment of agitation and aggression in Huntington’s disease. J Neuropsychiatry Clin Neurosci. 2013;25(3):E33-34.	4
Agitation	Pharmacological	Tavares A, Volpe FM. Cyproterone for treatment of hypersexuality in an elderly Huntington’s disease patient. Prog Neuropsychopharmacol Biol Psychiatry. 12 dec 2008;32(8):1994‑5.	4
Anxiety	Pharmacological	Duff K, Beglinger LJ, O’Rourke ME, Nopoulos P, Paulson HL, Paulsen JS. Risperidone and the treatment of psychiatric, motor, and cognitive symptoms in Huntington’s disease. Ann Clin Psychiatry. march 2008;20(1):1‑3.	4
Bruxism	Surgical	Nash MC, Ferrell RB, Lombardo MA, Williams RB. Treatment of bruxism in Huntington’s disease with botulinum toxin. J Neuropsychiatry Clin Neurosci. 2004;16(3):381‑2.	4
Bruxism	Non-pharmacological	Tan EK, Jankovic J, Ondo W. Bruxism in Huntington’s disease. Mov Disord. jan. 2000;15(1):171‑3.	4
Chorea	Pharmacological	Arena R, Iudice A, Virgili P, Moretti P, Menchetti G. Huntington’s disease: clinical effects of a short-term treatment with pimozide. Adv Biochem Psychopharmacol. 1980;24:573‑5.	4
Chorea	Pharmacological	Astin KJ, Gumpert EW. Letter: Tetrabenazine in chorea. Lancet. 23 march 1974;1(7856):512.	4
Chorea	Pharmacological	Barr AN, Fischer JH, Koller WC, Spunt AL, Singhal A. Serum haloperidol concentration and choreiform movements in Huntington’s disease. Neurology. jan. 1988;38(1):84‑8.	4
Chorea	Pharmacological	Beister A, Kraus P, Kuhn W, Dose M, Weindl A, Gerlach M. The N-methyl-D-aspartate antagonist memantine retards progression of Huntington’s disease. J Neural Transm Suppl. 2004;(68):117‑22.	3
Chorea	Pharmacological	Benazzi F. Rapid onset of tardive dyskinesia in Huntington disease with olanzapine. J Clin Psychopharmacol. aug. 2002;22(4):438‑9.	4
Chorea	Surgical	Biolsi B, Cif L, Fertit HE, Robles SG, Coubes P. Long-term follow-up of Huntington disease treated by bilateral deep brain stimulation of the internal globus pallidus. J Neurosurg. july 2008;109(1):130‑2.	4
Chorea	Pharmacological	Bogelman G, Hirschmann S, Modai I. Olanzapine and Huntington’s disease. J Clin Psychopharmacol. apr 2001;21(2):245‑6.	4
Chorea	Pharmacological	Bonelli RM, Niederwieser G, Diez J, Költringer P. Riluzole and olanzapine in Huntington’s disease. Eur J Neurol. march 2002;9(2):183‑4.	4
Chorea	Pharmacological	Brusa L, Orlacchio A, Moschella V, Iani C, Bernardi G, Mercuri NB. Treatment of the symptoms of Huntington’s disease: preliminary results comparing aripiprazole and tetrabenazine. Mov Disord. 15 jan. 2009;24(1):126‑9.	2
Chorea	Pharmacological	Caraceni T, Calderini G, Consolazione A, Riva E, Algeri S, Girotti F, et al. Biochemical aspects of Huntington’s chorea. J Neurol Neurosurg Psychiatry. june 1977;40(6):581‑7.	3
Chorea	Pharmacological	Chouza C, Romero S, Lorenzo J, Camano JL, Fontana AP, Alterwain P, et al. [Clinical trial of tiapride in patients with dyskinesia (author’s transl)]. Sem Hop. 25 march 1982;58(12):725‑33.	3
Chorea	Pharmacological	Csanda E, Tarczy M, Jelencsik I. Tiapride treatment of abnormal movements and painful conditions. Vol. 60. 1984. 3006 p.	3
Chorea	Pharmacological	Dallocchio C, Buffa C, Tinelli C, Mazzarello P. Effectiveness of risperidone in Huntington chorea patients. J Clin Psychopharmacol. febr 1999;19(1):101‑3.	3
Chorea	Pharmacological	Deroover J, Baro F, Bourguignon RP, Smets P. Tiapride versus placebo: a double-blind comparative study in the management of Huntington’s chorea. Curr Med Res Opin. 1984;9(5):329‑38.	2
Chorea	Pharmacological	Dipple HC. The use of olanzapine for movement disorder in Huntington’s disease: a first case report. J Neurol Neurosurg Psychiatry. july 1999;67(1):123‑4.	4
Chorea	Pharmacological	Dorsey R, Biglan K, Eberly S, Auinger P, Brocht A, Umeh CC, et al. Use of Tetrabenazine in Huntington Disease Patients on Antidepressants or with Advanced Disease: Results from the TETRA-HD Study. PLoS Curr. 13 nov 2011;3:RRN1283.	3
Chorea	Pharmacological	Erdemoglu AK, Boratav C. Risperidone in chorea and psychosis of Huntington’s disease. Eur J Neurol. march 2002;9(2):182‑3.	4
Chorea	Pharmacological	Etchebehere EC, Lima MC, Passos W, Maciel Júnior JA, Santos AO, Ramos CD, et al. Brain SPECT imaging in Huntington’s disease before and after therapy with olanzapine. Case report. Arq Neuropsiquiatr. sept 1999;57(3B):863‑6.	4
Chorea	Pharmacological	Fasano A, Cadeddu F, Guidubaldi A, Piano C, Soleti F, Zinzi P, et al. The long-term effect of tetrabenazine in the management of Huntington disease. Clin Neuropharmacol. dec 2008;31(6):313‑8.	3
Chorea	Surgical	Fasano A, Mazzone P, Piano C, Quaranta D, Soleti F, Bentivoglio AR. GPi-DBS in Huntington’s disease: results on motor function and cognition in a 72-year-old case. Mov Disord. 15 july 2008;23(9):1289‑92.	4
Chorea	Pharmacological	Ferrara JM, Mostile G, Hunter C, Adam OR, Jankovic J. Effect of tetrabenazine on motor function in patients with huntington disease. Neurol Ther. dec 2012;1(1):5.	3
Chorea	Pharmacological	Fog R, Pakkenberg H. Combined nitoman-pimozide treatment of Huntington’s chorea and other hyperkinetic syndromes. Acta Neurol Scand. 1970;46(2):249‑51.	4
Chorea	Pharmacological	Frank S, Ondo W, Fahn S, Hunter C, Oakes D, Plumb S, et al. A study of chorea after tetrabenazine withdrawal in patients with Huntington disease. Clin Neuropharmacol. june 2008;31(3):127‑33.	3
Chorea	Surgical	Garcia-Ruiz PJ, Ayerbe J, del Val J, Herranz A. Deep brain stimulation in disabling involuntary vocalization associated with Huntington’s disease. Parkinsonism Relat Disord. july 2012;18(6):803‑4.	4
Chorea	Pharmacological	Gilligan BS, Wodak J, Veale JL, Munro OR. Tetrabenazine in the treatment of extrapyramidal dyskinesias. Med J Aust. 4 nov 1972;2(19):1054‑6.	2
Chorea	Pharmacological	Girotti F, Carella F, Scigliano G, Grassi MP, Soliveri P, Giovannini P, et al. Effect of neuroleptic treatment on involuntary movements and motor performances in Huntington’s disease. J Neurol Neurosurg Psychiatry. aug. 1984;47(8):848‑52.	3
Chorea	Surgical	Gonzalez V, Cif L, Biolsi B, Garcia-Ptacek S, Seychelles A, Sanrey E, et al. Deep brain stimulation for Huntington’s disease: long-term results of a prospective open-label study. J Neurosurg. july 2014;121(1):114‑22.	4
Chorea	Surgical	Hebb MO, Garcia R, Gaudet P, Mendez IM. Bilateral stimulation of the globus pallidus internus to treat choreathetosis in Huntington’s disease: technical case report. Neurosurgery. febr 2006;58(2):E383; discussion E383.	4
Chorea	Pharmacological	Heckmann JM, Legg P, Sklar D, Fine J, Bryer A, Kies B. IV amantadine improves chorea in Huntington’s disease: an acute randomized, controlled study. Neurology. 10 aug. 2004;63(3):597‑8; author reply 597-598.	3
Chorea	Pharmacological	Hjermind LE, Law I, Jønch A, Stokholm J, Nielsen JE. Huntington’s disease: effect of memantine on FDG-PET brain metabolism? J Neuropsychiatry Clin Neurosci. 2011;23(2):206‑10.	4
Chorea	Pharmacological	Huntington Study Group. Tetrabenazine as antichorea therapy in Huntington disease: a randomized controlled trial. Neurology. 14 febr 2006;66(3):366‑72.	1
Chorea	Surgical	Huys D, Bartsch C, Poppe P, Lenartz D, Huff W, Prütting J, et al. Management and outcome of pallidal deep brain stimulation in severe Huntington’s disease. Fortschr Neurol Psychiatr. apr 2013;81(4):202‑5.	4
Chorea	Pharmacological	Janati A. Kluver-Bucy syndrome in Huntington’s chorea. J Nerv Ment Dis. oct 1985;173(10):632‑5.	4
Chorea	Surgical	Kang GA, Heath S, Rothlind J, Starr PA. Long-term follow-up of pallidal deep brain stimulation in two cases of Huntington’s disease. J Neurol Neurosurg Psychiatry. march 2011;82(3):272‑7.	4
Chorea	Pharmacological	Kingston D. Tetrabenazine for involuntary movement disorders. Med J Aust. 30 june 1979;1(13):628‑30.	3
Chorea	Pharmacological	Kocher R, Hobi V. [Treatment of dyskinesias with tiapride (author’s transl)]. Sem Hop. 18 dec 1980;56(47‑68):2033‑4.	4
Chorea	Pharmacological	Koller WC, Trimble J. The gait abnormality of Huntington’s disease. Neurology. oct 1985;35(10):1450‑4.	3
Chorea	Pharmacological	Laks J, Rocha M, Capitão C, Domingues RC, Ladeia G, Lima M, et al. Functional and motor response to low dose olanzapine in Huntington’s disease: case report. Arq Neuropsiquiatr. dec 2004;62(4):1092‑4.	4
Chorea	Pharmacological	Lal S, De la Vega C, Garelis E, Sourkes TL. Apomorphine, pimozide, L-Dopa and the probenecid test in Huntington’s chorea. Psychiatr Neurol Neurochir. apr 1973;76(2):113‑7.	4
Chorea	Surgical	López-Sendón Moreno JL, García-Caldentey J, Regidor I, del Álamo M, García de Yébenes J. A 5-year follow-up of deep brain stimulation in Huntington’s disease. Parkinsonism Relat Disord. febr 2014;20(2):260‑1.	4
Chorea	Pharmacological	Lucetti C, Del Dotto P, Gambaccini G, Dell’ Agnello G, Bernardini S, Rossi G, et al. IV amantadine improves chorea in Huntington’s disease: an acute randomized, controlled study. Neurology. 24 june 2003;60(12):1995‑7.	3
Chorea	Pharmacological	McArthur AW, Pollock M, Smidt NA. Combined therapy with tetrabenazine and pimozide in Huntington’s chorea: pilot study. N Z Med J. 25 febr 1976;83(558):114‑6.	3
Chorea	Pharmacological	Meco G, Bonifati V, Alessandri A, Brusa L. Letters. Human Psychopharmacology: Clinical and Experimental. 1 july 1995;10(4):353‑4.	3
Chorea	Surgical	Moro E, Lang AE, Strafella AP, Poon Y-YW, Arango PM, Dagher A, et al. Bilateral globus pallidus stimulation for Huntington’s disease. Ann Neurol. aug. 2004;56(2):290‑4.	4
Chorea	Pharmacological	O’Suilleabhain P, Dewey RB. A randomized trial of amantadine in Huntington disease. Arch Neurol. july 2003;60(7):996‑8.	2
Chorea	Pharmacological	Ondo WG, Tintner R, Thomas M, Jankovic J. Tetrabenazine treatment for Huntington’s disease-associated chorea. Clin Neuropharmacol. dec 2002;25(6):300‑2.	3
Chorea	Pharmacological	Ondo WG, Mejia NI, Hunter CB. A pilot study of the clinical efficacy and safety of memantine for Huntington’s disease. Parkinsonism Relat Disord. oct 2007;13(7):453‑4.	3
Chorea	Pharmacological	Pakkenberg H. The effect of tetrabenazine in some hyperkinetic syndromes. Acta Neurol Scand. 1968;44(3):391‑3.	4
Chorea	Pharmacological	Petit H, Havet JP. [Huntington’s chorea and sulpiride]. Lille Med. sept 1971;16(7):1019‑21.	4
Chorea	Pharmacological	Quinn N, marchden CD. A double blind trial of sulpiride in Huntington’s disease and tardive dyskinesia. J Neurol Neurosurg Psychiatry. aug. 1984;47(8):844‑7.	2
Chorea	Pharmacological	Ranouil R. [Value of dogmatil in the treatment of Huntington’s disease. Apropos of a psychiatric and statistical survey in Haute-Vienne]. Therapeutique. june 1973;49(5):413‑4.	4
Chorea	Pharmacological	Reveley MA, Dursun SM, Andrews H. Improvement of abnormal saccadic eye movements in Huntington’s disease by sulpiride: a case study. J Psychopharmacol (Oxford). jan. 1994;8(4):262‑5.	4
Chorea	Pharmacological	Reveley MA, Dursun SM, Andrews H. A comparative trial use of sulpiride and risperidone in Huntington’s disease: a pilot study. J Psychopharmacol (Oxford). jan. 1996;10(2):162‑5.	4
Chorea	Pharmacological	Roos RA, Buruma OJ, Bruyn GW, Kemp B, van der Velde EA. Tiapride in the treatment of Huntington’s chorea. Acta Neurol Scand. jan. 1982;65(1):45‑50.	2
Chorea	Pharmacological	Rosas HD, Koroshetz WJ, Jenkins BG, Chen YI, Hayden DL, Beal MF, et al. Riluzole therapy in Huntington’s disease (HD). Mov Disord. march 1999;14(2):326‑30.	4
Chorea	Pharmacological	Saran BM, Klein MS, Benay EM. Clinical evaluation of amantadine and haloperidol in Huntington’s chorea. J Clin Psychiatry. june 1980;41(6):221.	4
Chorea	Pharmacological	Scott LJ. Tetrabenazine: for chorea associated with Huntington’s disease. CNS Drugs. 1 dec 2011;25(12):1073‑85.	3
Chorea	Pharmacological	Soutar CA. Tetrabenazine for Huntington’s chorea. Br Med J. 3 oct 1970;4(5726):55.	4
Chorea	Surgical	Spielberger S, Hotter A, Wolf E, Eisner W, Müller J, Poewe W, et al. Deep brain stimulation in Huntington’s disease: A 4-year follow-up case report. Movement Disorders. 1 may 2012;27(6):806‑7.	4
Chorea	Surgical	Velez-Lago FM, Thompson A, Oyama G, Hardwick A, Sporrer JM, Zeilman P, et al. Differential and better response to deep brain stimulation of chorea compared to dystonia in Huntington’s disease. Stereotact Funct Neurosurg. 2013;91(2):129‑33.	4
Chorea	Pharmacological	Verhagen Metman L, Morris MJ, Farmer C, Gillespie M, Mosby K, Wuu J, et al. Huntington’s disease: a randomized, controlled trial using the NMDA-antagonist amantadine. Neurology. 10 sept 2002;59(5):694‑9.	2
Chorea	Pharmacological	Zenglein JP, Baldauf E, Hussaini M. [A new treatment of Huntington’s chorea. Report of three cases (author’s transl)]. Sem Hop. 18 sept 1978;54(25‑28):871‑4.	4
Chorea	Surgical	Zittel S, Moll CKE, Gulberti A, Tadic V, Rasche D, Bäumer T, et al. Pallidal deep brain stimulation in Huntington’s disease. Parkinsonism Relat Disord. sept 2015;21(9):1105‑8.	4
Chorea Akathisia	Pharmacological	Frank S. Tetrabenazine as anti-chorea therapy in Huntington disease: an open-label continuation study. Huntington Study Group/TETRA-HD Investigators. BMC Neurol. 18 dec 2009;9:62.	3
Chorea Akathisia	Pharmacological	Huang CY, McLeod JG, Holland RT, Elliot C. Tetrabenazine in the treatment of Huntington’s chorea. Med J Aust. 17 apr 1976;1(16):583‑4.	4
Chorea Cognitive disorders	Pharmacological	Huntington Study Group. Dosage effects of riluzole in Huntington’s disease: a multicenter placebo-controlled study. Neurology. 9 dec 2003;61(11):1551‑6.	2
Chorea Cognitive disorders	Pharmacological	Landwehrmeyer GB, Dubois B, de Yébenes JG, Kremer B, Gaus W, Kraus PH, et al. Riluzole in Huntington’s disease: a 3-year, randomized controlled study. Ann Neurol. sept 2007;62(3):262‑72.	1
Chorea Cognitive disorders	Pharmacological	Seppi K, Mueller J, Bodner T, Brandauer E, Benke T, Weirich-Schwaiger H, et al. Riluzole in Huntington’s disease (HD): an open label study with one year follow up. J Neurol. oct 2001;248(10):866‑9.	3
Chorea Gait & Balance disorders	Pharmacological	Ciammola A, Sassone J, Colciago C, Mencacci NE, Poletti B, Ciarmiello A, et al. Aripiprazole in the treatment of Huntington’s disease: a case series. Neuropsychiatr Dis Treat. 2009;5:1‑4.	4
Chorea Gait & Balance disorders	Pharmacological	Knowling MR, Wrench W. Treatment of Huntington’s chorea with sulpiride. S Afr Med J. 2 febr 1991;79(3):169.	4
Chorea Gait & Balance disorders Manual dexterity	Pharmacological	Bonelli RM, Mahnert FA, Niederwieser G. Olanzapine for Huntington’s disease: an open label study. Clin Neuropharmacol. oct 2002;25(5):263‑5.	3
Chorea Gait & Balance disorders Manual dexterity	Pharmacological	Bonelli RM, Niederwieser G, Tribl GG, Költringer P. High-dose olanzapine in Huntington’s disease. Int Clin Psychopharmacol. march 2002;17(2):91‑3.	4
Chorea Hallucinations/Delusions	Pharmacological	Cankurtaran ES, Ozalp E, Soygur H, Cakir A. Clinical experience with risperidone and memantine in the treatment of Huntington’s disease. J Natl Med Assoc. aug. 2006;98(8):1353‑5.	4
Chorea Hallucinations/Delusions	Pharmacological	Edlinger M, Seppi K, Fleischhacker W, Hofer A. Treatment of psychotic and behavioral symptoms with clozapine, aripiprazole, and reboxetine in a patient with Huntington’s disease. Int Clin Psychopharmacol. july 2013;28(4):214‑6.	4
Chorea Hallucinations/Delusions	Pharmacological	Lin W-C, Chou Y-H. Aripiprazole effects on psychosis and chorea in a patient with Huntington’s disease. Am J Psychiatry. sept 2008;165(9):1207‑8.	4
Chorea Hallucinations/Delusions	Pharmacological	Oulis P, Mourikis I, Konstantakopoulos G, Papageorgiou SG, Kouzoupis AV. Aripiprazole in the treatment of olanzapine-resistant psychotic and motor symptoms of Huntington’s disease. J Neuropsychiatry Clin Neurosci. 2010;22(3):352c.e4-352.e5.	4
Chorea Hallucinations/Delusions	Pharmacological	Paleacu D, Anca M, Giladi N. Olanzapine in Huntington’s disease. Acta Neurol Scand. june 2002;105(6):441‑4.	3
Chorea Hallucinations/Delusions	Pharmacological	Parsa MA, Szigethy E, Voci JM, Meltzer HY. Risperidone in treatment of choreoathetosis of Huntington’s disease. J Clin Psychopharmacol. apr 1997;17(2):134‑5.	4
Chorea Hallucinations/Delusions	Pharmacological	Yavuz KF, Ulusoy S, Alnıak İ. Aripiprazole treatment for choreoathetoid and psychotic symptoms of Huntington’s disease. J Neuropsychiatry Clin Neurosci. 2013;25(2):E31.	4
Chorea Irritability Perseverations Hallucinations/Delusions	Pharmacological	Johnston TG. Risperidone long-acting injection and Huntington’s disease: case series with significant psychiatric and behavioural symptoms. Int Clin Psychopharmacol. march 2011;26(2):114‑9.	4
Chorea Manual dexterity	Pharmacological	McLellan DL, Chalmers RJ, Johnson RH. A double-blind trial of tetrabenazine, thiopropazate, and placebo in patients with chorea. Lancet. 26 jan. 1974;1(7848):104‑7.	3
Chorea Sexual disorders Agitation	Pharmacological	Jhanjee A, Anand KS, Bajaj BK. Hypersexual features in Huntington’s disease. Singapore Med J. june 2011;52(6):e131-133.	4
Chorea Swallowing disorders Anxiety Perseverations Hallucinations/Delusions	Pharmacological	Squitieri F, Cannella M, Porcellini A, Brusa L, Simonelli M, Ruggieri S. Short-term effects of olanzapine in Huntington disease. Neuropsychiatry Neuropsychol Behav Neurol. jan. 2001;14(1):69‑72.	3
Cognitive disorders	Non-pharmacological	Cruickshank TM, Thompson JA, Domínguez D JF, Reyes AP, Bynevelt M, Georgiou-Karistianis N, et al. The effect of multidisciplinary rehabilitation on brain structure and cognition in Huntington’s disease: an exploratory study. Brain Behav. febr 2015;5(2):e00312.	2
Cognitive disorders	Pharmacological	Cubo E, Shannon KM, Tracy D, Jaglin JA, Bernard BA, Wuu J, et al. Effect of donepezil on motor and cognitive function in Huntington disease. Neurology. 10 oct 2006;67(7):1268‑71.	2
Cognitive disorders	Pharmacological	de Tommaso M, Specchio N, Sciruicchio V, Difruscolo O, Specchio LM. Effects of rivastigmine on motor and cognitive impairment in Huntington’s disease. Mov Disord. dec 2004;19(12):1516‑8.	3
Cognitive disorders	Pharmacological	de Tommaso M, Difruscolo O, Sciruicchio V, Specchio N, Livrea P. Two years’ follow-up of rivastigmine treatment in Huntington disease. Clin Neuropharmacol. febr 2007;30(1):43‑6.	3
Cognitive disorders	Pharmacological	Feigin A, Kieburtz K, Como P, Hickey C, Claude K, Abwender D, et al. Assessment of coenzyme Q10 tolerability in Huntington’s disease. Mov Disord. may 1996;11(3):321‑3.	3
Cognitive disorders	Pharmacological	Fernandez HH, Friedman JH, Grace J, Beason-Hazen S. Donepezil for Huntington’s disease. Mov Disord. jan. 2000;15(1):173‑6.	4
Cognitive disorders	Pharmacological	HORIZON Investigators of the Huntington Study Group and European Huntington’s Disease Network. A randomized, double-blind, placebo-controlled study of latrepirdine in patients with mild to moderate Huntington disease. JAMA Neurol. jan. 2013;70(1):25‑33.	1
Cognitive disorders	Pharmacological	Huntington Study Group. A randomized, placebo-controlled trial of coenzyme Q10 and remacemide in Huntington’s disease. Neurology. 14 aug. 2001;57(3):397‑404.	1
Cognitive disorders	Pharmacological	Kieburtz K, McDermott MP, Voss TS, Corey-Bloom J, Deuel LM, Dorsey ER, et al. A randomized, placebo-controlled trial of latrepirdine in Huntington disease. Arch Neurol. febr 2010;67(2):154‑60.	2
Cognitive disorders	Pharmacological	Rot U, Kobal J, Sever A, Pirtosek Z, Mesec A. Rivastigmine in the treatment of Huntington’s disease. Eur J Neurol. nov 2002;9(6):689‑90.	4
Cognitive disorders	Pharmacological	Sešok S, Bolle N, Kobal J, Bucik V, Vodušek DB. Cognitive function in early clinical phase huntington disease after rivastigmine treatment. Psychiatr Danub. sept 2014;26(3):239‑48.	2
Dental diseases	Pharmacological	Boyle CA, Frölander C, Manley G. Providing dental care for patients with Huntington’s disease. Dent Update. june 2008;35(5):333‑6.	4
Dental diseases	Pharmacological	Cangemi CF, Miller RJ. Huntington’s disease: review and anesthetic case management. Anesth Prog. 1998;45(4):150‑3.	4
Dental diseases	Non-pharmacological	Lewis D, Fiske J, Dougall A. Access to special care dentistry, part 7. Special care dentistry services: seamless care for people in their middle years--part 1. Br Dent J. 27 sept 2008;205(6):305‑17.	4
Dental diseases	Non-pharmacological	Manley G, Lane H, Carlsson A, Ahlborg B, Mårtensson Å, Nilsson MB, et al. Guideline for oral healthcare of adults with Huntington’s disease. Neurodegenerative Disease Management. 13 jan. 2012;2(1):55‑65.	Prof. Agreement
Dental diseases	Pharmacological	Moline DO, Iglehart DR. Huntington’s chorea: review and case report. Gen Dent. apr 1985;33(2):131‑3.	4
Depression	Pharmacological	Beglinger LJ, Adams WH, Langbehn D, Fiedorowicz JG, Jorge R, Biglan K, et al. Results of the citalopram to enhance cognition in Huntington disease trial. Mov Disord. march 2014;29(3):401‑5.	2
Depression	Pharmacological	Bonelli RM. Mirtazapine in suicidal Huntington’s disease. Ann Pharmacother. march 2003;37(3):452.	4
Depression	Pharmacological	Ford MF. Treatment of depression in Huntington’s disease with monoamine oxidase inhibitors. Br J Psychiatry. nov 1986;149:654‑6.	4
Depression	Pharmacological	Holl AK, Wilkinson L, Painold A, Holl EM, Bonelli RM. Combating depression in Huntington’s disease: effective antidepressive treatment with venlafaxine XR. Int Clin Psychopharmacol. jan. 2010;25(1):46‑50.	3
Depression	Pharmacological	Moldawsky RJ. Effect of amoxapine on speech in a patient with Huntington’s disease. Am J Psychiatry. jan. 1984;141(1):150.	4
Depression	Pharmacological	Whittier J, Haydu G, Crawford J. Effect of imipramine (Tofranil) on depression and hyperkinesia in Huntington’s disease. Am J Psychiatry. july 1961;118:79.	4
Depression Hallucinations/Delusions	Non-pharmacological	Evans DL, Pedersen CA, Tancer ME. ECT in the Treatment of Organic Psychosis in Huntington’s Disease. Convuls Ther. 1987;3(2):145‑50.	4
Depression Hallucinations/Delusions	Non-pharmacological	Lewis CF, DeQuardo JR, Tandon R. ECT in genetically confirmed Huntington’s disease. J Neuropsychiatry Clin Neurosci. 1996;8(2):209‑10.	4
Depression Hallucinations/Delusions	Non-pharmacological	Ranen NG, Peyser CE, Folstein SE. ECT as a treatment for depression in Huntington’s disease. J Neuropsychiatry Clin Neurosci. 1994;6(2):154‑9.	4
Executive functions	Non-pharmacological	Devos H, Nieuwboer A, Tant M, De Weerdt W, Vandenberghe W. Determinants of fitness to drive in Huntington disease. Neurology. 6 nov 2012;79(19):1975‑82.	3
Executive functions	Non-pharmacological	Metzler-Baddeley, Claudia, Jaime Cantera, Elizabeth Coulthard, Anne Rosser, Derek K. Jones, and Roland J. Baddeley. "Improved executive function and callosal white matter microstructure after rhythm exercise in Huntington's Disease." Journal of Huntington's disease 3, no. 3 (2014): 273-283.	4
Gait & Balance disorders	Non-pharmacological	Piira A, van Walsem MR, Mikalsen G, Øie L, Frich JC, Knutsen S. Effects of a Two-Year Intensive Multidisciplinary Rehabilitation Program for Patients with Huntington’s Disease: a Prospective Intervention Study. PLoS Curr. 25 nov 2014;6	4
Gait & Balance disorders	Non-pharmacological	Kloos AD, Kegelmeyer DA, White SE, Kostyk SK. The impact of different types of assistive devices on gait measures and safety in Huntington’s disease. PLoS ONE. 2012;7(2):e30903.	2
Gait & Balance disorders	Non-pharmacological	Kegelmeyer D, Fritz N, Kostyk S, Kloos A. J04 The effect of video game-based exercise on dynamic balance and mobility in individuals with Huntington’s disease. J Neurol Neurosurg Psychiatry. 1 sept 2010;81(Suppl 1):A40.	2
Gait & Balance disorders	Non-pharmacological	Piira, Anu, Marleen R. van Walsem, Geir Mikalsen, Kjell Haavik Nilsen, Synnove Knutsen, and Jan C. Frich. "Effects of a one year intensive multidisciplinary rehabilitation program for patients with Huntington’s disease: a prospective intervention study." PLoS currents 5 (2013).	4
Gait & Balance disorders	Non-pharmacological	Rao AK, Muratori L, Louis ED, Moskowitz CB, Marder KS. Spectrum of gait impairments in presymptomatic and symptomatic Huntington’s disease. Mov Disord. 15 june 2008;23(8):1100‑7.	3
Gait & Balance disorders Global motor capacities	Non-pharmacological	Quinn L, Rao A. Physical Therapy for People with Huntington Disease: Current Perspectives and Case Report. Journal of Neurologic Physical Therapy. 2002;26(3):145.	4
Gait & Balance disorders Global motor capacities	Non-pharmacological	Bilney B, Morris ME, Churchyard A, Chiu E, Georgiou-Karistianis N. Evidence for a disorder of locomotor timing in Huntington’s disease. Mov Disord. jan. 2005;20(1):51‑7.	3
Gait & Balance disorders Global motor capacities	Non-pharmacological	Bohlen S, Ekwall C, Hellström K, Vesterlin H, Björnefur M, Wiklund L, et al. Physical therapy in Huntington’s disease--toward objective assessments? Eur J Neurol. febr 2013;20(2):389‑93.	4
Gait & Balance disorders Global motor capacities	Non-pharmacological	Busse ME, Wiles CM, Rosser AE. Mobility and falls in people with Huntington’s disease. J Neurol Neurosurg Psychiatry. jan. 2009;80(1):88‑90.	4
Gait & Balance disorders Global motor capacities	Non-pharmacological	Delval A, Krystkowiak P, Delliaux M, Dujardin K, Blatt J, Destée A et al. Role of attentional resources on gait performance in Huntington’s disease. Movement Disorders. 2008; 23 (5) 684-689.	3
Gait & Balance disorders Global motor capacities	Non-pharmacological	Ekwall, Anna Ingrid Camilla. "Physiotherapy for Patients with Huntington´ s Disease: Effects of a Treatment Program with focus on balance and transitions and the Intercorrelation between Assessment Tools." (2010).	4
Gait & Balance disorders Global motor capacities	Non-pharmacological	Khalil H, Quinn L, van Deursen R, Dawes H, Playle R, Rosser A, et al. What effect does a structured home-based exercise programme have on people with Huntington’s disease? A randomized, controlled pilot study. Clin Rehabil. july 2013;27(7):646‑58.	2
Gait & Balance disorders Global motor capacities	Non-pharmacological	Mirek E, Filip M, Banaszkiewicz K, Rudzińska M, Szymura J, Pasiut S, et al. The effects of physiotherapy with PNF concept on gait and balance of patients with Huntington’s disease - pilot study. Neurol Neurochir Pol. 2015;49(6):354‑7.	4
Gait & Balance disorders Global motor capacities	Non-pharmacological	Quinn L, Debono K, Dawes H, Rosser AE, Nemeth AH, Rickards H, et al. Task-specific training in Huntington disease: a randomized controlled feasibility trial. Phys Ther. nov 2014;94(11):1555‑68.	2
Gait & Balance disorders Global motor capacities	Non-pharmacological	Thaut MH, Miltner R, Lange HW, Hurt CP, Hoemberg V. Velocity modulation and rhythmic synchronization of gait in Huntington’s disease. Mov Disord. sept 1999;14(5):808‑19.	4
Gait & Balance disorders Global motor capacities	Non-pharmacological	Thompson, Jennifer A., T. M. Cruickshank, L. E. Penailillo, J. W. Lee, R. U. Newton, R. A. Barker, and Melanie R. Ziman. "The effects of multidisciplinary rehabilitation in patients with early‐to‐middle‐stage Huntington's disease: a pilot study." European Journal of Neurology 20, no. 9 (2013): 1325-1329.	3
Gait & Balance disorders Global motor capacities	Non-pharmacological	Zinzi P, Salmaso D, De Grandis R, Graziani G, Maceroni S, Bentivoglio A, et al. Effects of an intensive rehabilitation programme on patients with Huntington’s disease: a pilot study. Clin Rehabil. july 2007;21(7):603‑13.	4
Gait & Balance disorders Global motor capacities	Non-pharmacological	Busse M, Quinn L, Debono K, Jones K, Collett J, Playle R, et al. A randomized feasibility study of a 12-week community-based exercise program for people with Huntington’s disease. J Neurol Phys Ther. dec 2013;37(4):149‑58.	2
Gait & Balance disorders Manual dexterity	Non-pharmacological	Ciancarelli I, Tozzi Ciancarelli MG, Carolei A. Effectiveness of intensive neurorehabilitation in patients with Huntington’s disease. Eur J Phys Rehabil Med. apr 2013;49(2):189‑95.	2
Hallucinations/Delusions	Pharmacological	Madhusoodanan S, Brenner R. Use of risperidone in psychosis associated with Huntington’s disease. Am J Geriatr Psychiatry. 1998;6(4):347‑9.	4
Hallucinations/Delusions	Pharmacological	Madhusoodanan S, Brenner R, Moise D, Sindagi J, Brafman I. Psychiatric and neuropsychological abnormalities in Huntington’s disease: a case study. Ann Clin Psychiatry. sept 1998;10(3):117‑20.	4
Hallucinations/Delusions	Pharmacological	Sajatovic M, Verbanac P, Ramirez LF, Meltzer HY. Clozapine treatment of psychiatric symptoms resistant to neuroleptic treatment in patients with Huntington’s chorea. Neurology. jan. 1991;41(1):156.	4
Hallucinations/Delusions	Pharmacological	Seitz DP, Millson RC. Quetiapine in the management of psychosis secondary to huntington’s disease: a case report. Can J Psychiatry. june 2004;49(6):413.	4
Hallucinations/Delusions	Pharmacological	Vallette N, Gosselin O, Kahn JP. [Efficacy of clozapine in the course of Huntington chorea: apropos of a clinical case]. Encephale. apr 2001;27(2):169‑71.	4
Hallucinations/Delusions Agitation	Pharmacological	Alpay M, Koroshetz WJ. Quetiapine in the treatment of behavioral disturbances in patients with Huntington’s disease. Psychosomatics. febr 2006;47(1):70‑2.	4
Incontinence	Pharmacological	Cochen V, Degos JD, Bachoud-Lévi AC. Efficiency of carbamazepine in the treatment of micturitional disturbances in Huntington disease. Neurology. 26 dec 2000;55(12):1934.	4
Irritability	Pharmacological	Ranen NG, Lipsey JR, Treisman G, Ross CA. Sertraline in the treatment of severe aggressiveness in Huntington’s disease. J Neuropsychiatry Clin Neurosci. 1996;8(3):338‑40.	4
Irritability	Pharmacological	De Marchi N, Daniele F, Ragone MA. Fluoxetine in the treatment of Huntington’s disease. Psychopharmacology (Berl). 1 jan. 2001;153(2):264‑6.	4
Irritability	Pharmacological	Désaméricq G, Dolbeau G, Verny C, Charles P, Durr A, Youssov K, et al. Effectiveness of anti-psychotics and related drugs in the Huntington French-speaking group cohort. PLoS ONE. 2014;9(1):e85430.	2
Irritability	Pharmacological	Shen Y-C. Lamotrigine in motor and mood symptoms of Huntington’s disease. World J Biol Psychiatry. 2008;9(2):147‑9.	4
Irritability Agitation	Pharmacological	Grove VE, Quintanilla J, DeVaney GT. Improvement of Huntington’s disease with olanzapine and valproate. N Engl J Med. 28 sept 2000;343(13):973‑4.	4
Irritability Hallucinations/Delusions	Pharmacological	Colosimo C, Cassetta E, Bentivoglio AR, Albanese A. Clozapine in Huntington’s disease. Neurology. may 1995;45(5):1023‑4.	4
Language & Communication disorders	Non-pharmacological	Ferm U, Sahlin A, Sundin L, Hartelius L. Using Talking Mats to support communication in persons with Huntington’s disease. Int J Lang Commun Disord. oct 2010;45(5):523‑36.	4
Language & Communication disorders	Non-pharmacological	Kaploun LR, Saxman JH, Wasserman P, Marder K. Acoustic Analysis of Voice and Speech Characteristics in Presymptomatic Gene Carriers of Huntington’s Disease: Biomarkers for Preclinical Sign Onset? Journal of Medical Speech - Language Pathology [Internet]. 1 june 2011	3
Language & Communication disorders	Non-pharmacological	Saldert C, Fors A, Ströberg S, Hartelius L. Comprehension of complex discourse in different stages of Huntington’s disease. Int J Lang Commun Disord. dec 2010;45(6):656‑69.	4
Lung functions	Non-pharmacological	Reyes A, Cruickshank T, Nosaka K, Ziman M. Respiratory muscle training on pulmonary and swallowing function in patients with Huntington’s disease: a pilot randomised controlled trial. Clin Rehabil. oct 2015;29(10):961‑73.	2
Myoclonus	Pharmacological	Carella F, Scaioli V, Ciano C, Binelli S, Oliva D, Girotti F. Adult onset myoclonic Huntington’s disease. Mov Disord. apr 1993;8(2):201‑5.	4
Myoclonus	Pharmacological	Kereshi S, Schlagenhauff RE, Richardson KS. Myoclonic and major seizures in early adult Huntington’s chorea: case-report and electro-clinical findings. Clin Electroencephalogr. apr 1980;11(2):44‑7.	4
Myoclonus	Pharmacological	Landau ME, Cannard KR. EEG characteristics in juvenile Huntington’s disease: a case report and review of the literature. Epileptic Disord. sept 2003;5(3):145‑8.	4
Myoclonus	Pharmacological	Novom S, Danna S, Goldberg MA. Intention myoclonus in Huntington’s disease. Bull Los Angeles Neurol Soc. apr 1976;41(2):82‑4.	4
Myoclonus	Pharmacological	Previdi P, Borgonovi R. Myoclonus and Huntington’s chorea: description of a case. Ital J Neurol Sci. june 1980;1(3):189‑91.	4
Myoclonus	Pharmacological	Saft C, Lauter T, Kraus PH, Przuntek H, Andrich JE. Dose-dependent improvement of myoclonic hyperkinesia due to Valproic acid in eight Huntington’s Disease patients: a case series. BMC Neurol. 28 febr 2006;6:11.	4
Myoclonus	Pharmacological	Thompson PD, Bhatia KP, Brown P, Davis MB, Pires M, Quinn NP, et al. Cortical myoclonus in Huntington’s disease. Mov Disord. nov 1994;9(6):633‑41.	4
Myoclonus	Pharmacological	Vogel CM, Drury I, Terry LC, Young AB. Myoclonus in adult Huntington’s disease. Ann Neurol. febr 1991;29(2):213‑5.	4
Perseverations Obsessive-compulsive disorders	Pharmacological	Patzold T, Brüne M. Obsessive compulsive disorder in huntington disease: a case of isolated obsessions successfully treated with sertraline. Neuropsychiatry Neuropsychol Behav Neurol. sept 2002;15(3):216‑9. Patzold T, Brüne M. Obsessive compulsive disorder in huntington disease: a case of isolated obsessions successfully treated with sertraline. Neuropsychiatry Neuropsychol Behav Neurol. sept 200…	4
Rigidity	Pharmacological	Barbeau A. L-dopa and juvenile Huntington’s disease. Lancet. 15 nov 1969;2(7629):1066.	4
Rigidity	Pharmacological	Bonelli RM, Niederwieser G, Diez J, Gruber A, Költringer P. Pramipexole ameliorates neurologic and psychiatric symptoms in a Westphal variant of Huntington’s disease. Clin Neuropharmacol. febr 2002;25(1):58‑60.	4
Rigidity	Pharmacological	Jongen PJ, Renier WO, Gabreëls FJ. Seven cases of Huntington’s disease in childhood and levodopa induced improvement in the hypokinetic--rigid form. Clin Neurol Neurosurg. 1980;82(4):251‑61.	4
Rigidity	Pharmacological	Low PA, Allsop JL, Halmagyi GM. Huntington’s chorea: the rigid form (Westphal variant) treated with levodopa. Med J Aust. 16 march 1974;1(11):393‑4.	4
Rigidity	Pharmacological	Magnet MK, Kapfhammer H-P, Bonelli RM. Cabergoline in Huntington’s disease: the first case report. Acta Neurol Scand. may 2006;113(5):355‑6.	4
Rigidity	Pharmacological	Magnet MK, Bonelli RM, Kapfhammer H-P. Amantadine in the akinetic-rigid variant of Huntington’s disease. Ann Pharmacother. aug. 2004;38(7‑8):1194‑6.	4
Rigidity	Pharmacological	Reuter I, Hu MT, Andrews TC, Brooks DJ, Clough C, Chaudhuri KR. Late onset levodopa responsive Huntington’s disease with minimal chorea masquerading as Parkinson plus syndrome. J Neurol Neurosurg Psychiatry. febr 2000;68(2):238‑41.	4
Rigidity	Pharmacological	Vargas AP, Carod-Artal FJ, Bomfim D, Vázquez-Cabrera C, Dantas-Barbosa C. Unusual early-onset Huntingtons disease. J Child Neurol. june 2003;18(6):429‑32.	4
Rigidity	Pharmacological	Wang S-C, Lee-Chen G-J, Wang C-K, Chen C-M, Tang L-M, Wu Y-R. Markedly asymmetrical parkinsonism as a leading feature of adult-onset Huntington’s disease. Mov Disord. july 2004;19(7):854‑6.	4
Swallowing disorders	Non-pharmacological	Giddens, Cheryl L., Anton E. Coleman, and Corey M. Adams. "A home program of speech therapy in Huntington's disease." Journal of medical speech-language pathology 18, no. 2 (2010): 1.	4
Swallowing disorders	Non-pharmacological	Monaco AD, Nuzzi A, Parente A, Lavermicocca V, Chiarelli T, Tommaso MD, et al. I03 Swallowing Function In The Early, Middle And Late Stages Of Huntington’s Disease. J Neurol Neurosurg Psychiatry. 1 sept 2014;85(Suppl 1):A58‑A58.	4
Swallowing disorders Weight loss	Non-pharmacological	Kagel MC, Leopold NA. Dysphagia in Huntington’s disease: a 16-year retrospective. Dysphagia. 1992;7(2):106‑14.	4
Weight loss	Non-pharmacological	Nance MA, Sanders G. Characteristics of individuals with Huntington disease in long-term care. Mov Disord. sept 1996;11(5):542‑8.	4
Weight loss	Non-pharmacological	Brotherton A, Campos L, Rowell A, Zoia V, Simpson SA, Rae D. Nutritional management of individuals with Huntington’s disease: nutritional guidelines. Neurodegenerative Disease Management. 13 jan. 2012;2(1):33‑43.	Prof. Agreement
Weight loss	Non-pharmacological	Cubo E, Rivadeneyra J, Mariscal N, Armesto D, Mateos A, Camara R. The Relationship between Dietary Intake, Nutrition Status and Huntington’s Disease Severity (P1.050). Neurology [Internet]. 8 apr 2014;82(10 Supplement).	4
Weight loss	Non-pharmacological	Cubo E, Rivadeneyra J, Armesto D, Mariscal N, Martinez A, Camara RJ, et al. Relationship between Nutritional Status and the Severity of Huntington’s Disease. A Spanish Multicenter Dietary Intake Study. J Huntingtons Dis. 2015;4(1):78‑85.	4
Weight loss	Non-pharmacological	Leopold NA, Kagel MC. Dysphagia in Huntington’s disease. Arch Neurol. jan. 1985;42(1):57‑60.	4
Weight loss	Non-pharmacological	Popovic V, Svetel M, Djurovic M, Petrovic S, Doknic M, Pekic S, et al. Circulating and cerebrospinal fluid ghrelin and leptin: potential role in altered body weight in Huntington’s disease. Eur J Endocrinol. oct 2004;151(4):451‑5.	3
Weight loss	Non-pharmacological	Rivadeneyra J, Cubo E, Polo CG, Mariscal N, Calvo S, Mateos A, et al. J14 Mediterranean Diet And Nutritional Composition Of Patients With Huntington’s Disease. Spanish Multicenter Study Of The European Group For Huntington’s Disease. J Neurol Neurosurg Psychiatry. 1 sept 2014;85(Suppl 1):A69‑70.	4
Weight loss	Non-pharmacological	Trejo A, Tarrats RM, Alonso ME, Boll M-C, Ochoa A, Velásquez L. Assessment of the nutrition status of patients with Huntington’s disease. Nutrition. febr 2004;20(2):192‑6.	3
Weight loss	Non-pharmacological	Trejo A, Boll M-C, Alonso ME, Ochoa A, Velásquez L. Use of oral nutritional supplements in patients with Huntington’s disease. Nutrition. sept 2005;21(9):889‑94.	4
